# Supplementary material
Source: PubMed Central journal article supplement (PMC3431626)

## SUPPLEMENTARY

**FIGURE S1.** Generation of *pvr*<sup>5363</sup> and *pvf2-3* mutant clones. A. Diagram of *P*{*XP*}*Pvf2*<sup>d00645</sup> and *PBac*{*WH*}*Pvf3*<sup>04842</sup> *P* element insertions into *pvf2* and *pvf3* genes, respectively (top diagram). *P* element excision by recombination removed the promoter region of *pvf2* and *pvf3* after the first exon to generate *pvf2-3* deletion mutant (bottom diagram). Black and white boxes represent translated and untranslated sequence, respectively. Transcription initiation sites are indicated with arrows and the *P* element recombination sites depicted with triangles. The scale bar indicates 1kbp, and long intronic regions are shown as bent lines with their sizes labeled above. B. Generation of *pvf2-3*, *neoFRT(40A)* and *pvr*; *neoFRT(40A)* recombinants for MARCM. Single fly PCR of *neoFRT(40A)* (lanes 2-7), *pvr*<sup>5363</sup> (lanes 8-13), *pvf2-3* (14-19). The individual genotypes are indicated. Ladders are shown in lane 1 (100bp) and lane 20 (1kbp) and with labeled with respective bands sizes. PCR of the gene region flanking the 63bp deletion found in *pvr*<sup>5363</sup> generates a band of ~160bps in wildtype *pvr* and ~100bps in the *pvr*<sup>5363</sup>. PCR of DNA from heterozygous *pvr*<sup>5363</sup> flies show 2 bands at ~100bps and ~160bps (lanes 9 and 11).

Figure S1-

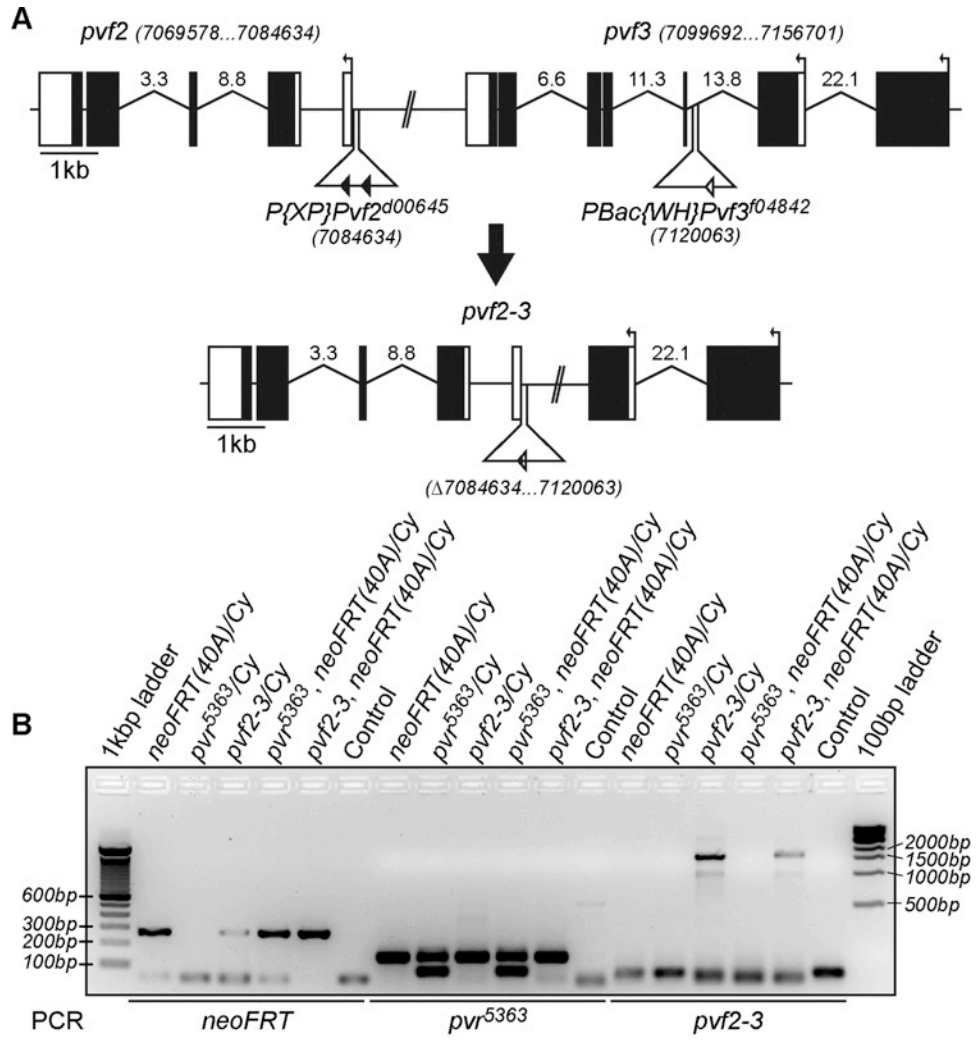

Supplement: supp_M112.378018_jbc.M112.378018-1.pdf [file supp_M112.378018_jbc.M112.378018-1.pdf]
